# Supplementary material for: Global analysis of erythroid cells redox status reveals the involvement of Prdx1 and Prdx2 in the severity of beta thalassemia
Source: PubMed Central journal article supplement (PMC6283586; doi:10.1371/journal.pone.0208316), 2018-12-06
Supplement: pone.0208316.s002.pdf [file pone.0208316.s002.pdf]

**Table S1. Primer sequences**

| Gene                                               | Accession number | Forward primer                  | Reverse primer                    |
|----------------------------------------------------|------------------|---------------------------------|-----------------------------------|
| Beta Actin (BAC)                                   | NM_001101.3      | 5'-CAAGCAGGAGTATGACGAGTC-3'     | 5'-GCCATGCCAATCTCATCTTG-3'        |
| Hypoxanthine Phosphoribosyltransferase 1 (HPRT1)   | NM_000194.2      | 5'-AGATGGTCAAGGTCGCAAG-3'       | 5'-GTATTCATTATAGTCAAGGGCATATCC-3' |
| Peroxiredoxin 1 (PRDX1)                            | NM_002574.3      | 5'-TGTAATGACCTCCCTGTTGG-3'      | 5'-TATCACTGCCAGGTTTCCAG-3'        |
| Peroxiredoxin 2 (PRDX2)                            | NM_005809.5      | 5'-CTGTTAATGATTGCCTGTGGG-3'     | 5'-TGGGCTTAATCGTGCTACTG-3'        |
| Peroxiredoxin 3 (PRDX3)                            | NM_006793.4      | 5'-TCCCACCTTAGCCATCTTGC-3'      | 5'-GTAGTCTCGGGAAATCTGCTTAG-3'     |
| Peroxiredoxin 4 (PRDX4)                            | NM_006406.1      | 5'-CGTTTGGTTCAAGCATTCCAG-3'     | 5'-CTTTTGGCGACAGACTTGAAG-3'       |
| Peroxiredoxin 5 (PRDX5)                            | NM_012094.4      | 5'-AGAAGGGTGTGCTGTTTGG-3'       | 5'-TCATTAACACTCAGACAGGCC-3'       |
| Peroxiredoxin 6 (PRDX6)                            | NM_004905.2      | 5'-CAGCACTTTCTGGGAGACT-3'       | 5'-GGGCAATCAACTTAACATTCCTC-3'     |
| Catalase (CAT)                                     | NM_001752.3      | 5'-TGAATGAGGAACAGAGGAAACG-3'    | 5'-GTACTTGTCCAGAAGAGCCTG-3'       |
| Superoxide Dismutase 1 (SOD1)                      | NM_000454.4      | 5'-GGGCAAAGGTGGAATGAAG-3'       | 5'-CAGCTAGCAGGATAACAGATGAG-3'     |
| Glutathione Peroxidase (GPX1)                      | NM_000581.2      | 5'-TTCCAGACCATTGACATCGAG-3'     | 5'-CACCTCATAGATGAAAACCC-3'        |
| Sulfiredoxin (SRX)                                 | NM_080725.2      | 5'-AGCATCCACACCAGACTTG-3'       | 5'-ACCCCTGCTATCCCTTCTG-3'         |
| Thioredoxin 1 (TRX1)                               | NM_003329.3      | 5'-TGGTGAAGCAGATCGAGAGCAAAGA-3' | 5'-ACCACGTGGCTGAGAAGTCAACTA-3'    |
| Thioredoxin Reductase 1 (TRXR1)                    | NM_003330.3      | 5'-CAACATTGTCTGTGACCAAGC-3'     | 5'-AACCTCTAGAAAACCTCGCC-3'        |
| Nuclear Factor Erythroid 2-Related Factor 2 (NRF2) | NM_006164.4      | 5'-GCTACGTGATGAAGATGGAAAAC-3'   | 5'-AGCTCAGAAAAGGTCAAATCCTC-3'     |
| Kelch-like ECH-associated protein 1 (KEAP1)        | NM_012289.3      | 5'-AACAGAGACGTGGACTTTTCG-3'     | 5'-GTGTCTGTATCTGGGTCGTAAC-3'      |
| Protein kinase C delta (PKC $\delta$ )             | NM_006254.3      | 5'-TGGAAAAGCGGAGGTTGG-3'        | 5'-ATGGAGTCGATGAGGTTCTTG-3'       |
| ETS Proto-Oncogene 1, Transcription Factor (ETS1)  | NM_001143820.1   | 5'-ATCATCCACAAGACAGCGG-3'       | 5'-GTTCCCCAGCCCTTC-3'             |
| ETS Proto-Oncogene 2, Transcription Factor (ETS2)  | NM_005239.5      | 5'-TCAGACAAATCCTGCCAGTC-3'      | 5'-GCTTCTCGTAGTTCATCTTGGG-3'      |
